# Supplementary material
Source: PubMed Central journal article supplement (PMC8098098)
Supplement: ryct200503appendixe1.pdf [file ryct200503appendixe1.pdf]

# General Electric Standard Dose

| 1.7 CT Scanning Protocol                   | Inspiratory CT  | Expiratory CT   | Inspiratory CT  | Expiratory CT   | Inspiratory CT      | Expiratory CT       | Inspiratory CT  | Expiratory CT   |
|--------------------------------------------|-----------------|-----------------|-----------------|-----------------|---------------------|---------------------|-----------------|-----------------|
| Scanner Make                               | GE              | GE              | GE              | GE              | GE                  | GE                  | GE              | GE              |
| Scanner Model                              | LS 16           | LS 16           | VCT 64          | VCT 64          | Discovery 750 HD 64 | Discovery 750 HD 64 | Revolution 256  | Revolution 256  |
| Scan Type                                  | Helical         | Helical         | Helical         | Helical         | Helical             | Helical             | Helical         | Helical         |
| Scan FOV                                   | Large           | Large           | Large           | Large           | Large               | Large               | Large           | Large           |
| Rotation Time (s)                          | 0.5             | 0.5             | 0.5             | 0.5             | 0.5                 | 0.5                 | 0.5             | 0.5             |
| Det. Configuration                         | 16 x 0.625      | 16 x 0.625      | 64 x 0.625      | 64 x 0.625      | 64 x 0.625          | 64 x 0.625          | 64 x 0.625      | 64 x 0.625      |
| Pitch                                      | 1.375           | 1.375           | 0.984           | 0.984           | 0.984               | 0.984               | 0.992           | 0.992           |
| kVp                                        | 120             | 120             | 120             | 120             | 120                 | 120                 | 120             | 120             |
| mA Setting                                 | 400             | 100             | 400             | 100             | 400                 | 100                 | 400             | 100             |
| Dose Modulation                            | Auto-mA OFF         | Auto-mA OFF         | Auto-mA OFF     | Auto-mA OFF     |
| HD Mode                                    | OFF             | OFF             | OFF             | OFF             | OFF                 | OFF                 | OFF             | OFF             |
| Scan Time(s) 30cm Length                   | <10             | <10             | <10             | <10             | <10                 | <10                 | <10             | <10             |
| Additional Image Filters                   | No Selection        | No Selection        | No Selection    | No Selection    |
| Thickness (mm)                             | 0.625           | 0.625           | 0.625           | 0.625           | 0.625               | 0.625               | 0.625           | 0.625           |
| Interval (mm)                              | 0.5             | 0.5             | 0.5             | 0.5             | 0.5                 | 0.5                 | 0.5             | 0.5             |
| Iterative Reconstruction (Noise Reduction) | Do Not Use ASIR     | Do Not Use ASIR     | Do Not Use ASIR | Do Not Use ASIR |
| <b>Reconstructions</b>                     |                 |                 |                 |                 |                     |                     |                 |                 |
| RECON 1 Algorithm                          | Standard        | Standard        | Standard        | Standard        | Standard            | Standard            | Standard        | Standard        |
| RECON 2 Algorithm                          | Bone            | Bone            | Bone            | Bone            | Bone                | Bone                | Bone            | Bone            |
| DFOV (mm)*                                 | Same as phase 1     | Same as phase 1     | Same as phase 1 | Same as phase 1 |

\*If the DFOV from the baseline CT scan was too large, additional inspiratory and expiratory reconstructions will be requested using the RECON 1 algorithm and a tighter DFOV. The CT Scan Parameters Report provided by the coordinator will specify the required reconstructions.

# General Electric Reduced Dose

| 1.7 CT Scanning Protocol                   | Inspiratory Lowdose and Iterative CT                                                                                                                                                                                                                                                |                        |                      |
|--------------------------------------------|-------------------------------------------------------------------------------------------------------------------------------------------------------------------------------------------------------------------------------------------------------------------------------------|------------------------|----------------------|
|                                            | GE                                                                                                                                                                                                                                                                                  | GE                     | GE                   |
| Scanner Make                               | VCT 64                                                                                                                                                                                                                                                                              | Discovery CT 750 HD 64 | Revolution 256       |
| Scanner Model                              | Helical                                                                                                                                                                                                                                                                             | Helical                | Helical              |
| Scan Type                                  | Large                                                                                                                                                                                                                                                                               | Large                  | Large                |
| Scan FOV                                   | 0.5                                                                                                                                                                                                                                                                                 | 0.5                    | 0.5                  |
| Rotation Time (s)                          | 64 x 0.625                                                                                                                                                                                                                                                                          | 64 x 0.625             | 64 x 0.625           |
| Det. Configuration                         | 0.984                                                                                                                                                                                                                                                                               | 0.984                  | 0.992                |
| Pitch                                      | 120                                                                                                                                                                                                                                                                                 | 120                    | 120                  |
| kVp                                        | Auto-mA, Smart-mA ON                                                                                                                                                                                                                                                                | Auto-mA, Smart-mA ON   | Auto-mA, Smart-mA ON |
| Dose Modulation                            | OFF                                                                                                                                                                                                                                                                                 | OFF                    | OFF                  |
| HD Mode                                    | NI=66.5                                                                                                                                                                                                                                                                             | NI=66.5                | NI=50.6              |
| Target noise index                         | 100                                                                                                                                                                                                                                                                                 | 100                    | 100                  |
| Max mA limit                               | <10                                                                                                                                                                                                                                                                                 | <10                    | <10                  |
| Scan Time(s) 30cm Length                   | No Selection                                                                                                                                                                                                                                                                        | No Selection           | No Selection         |
| Additional Image Filters                   | 0.625                                                                                                                                                                                                                                                                               | 0.625                  | 0.625                |
| Thickness (mm)                             | 0.5                                                                                                                                                                                                                                                                                 | 0.5                    | 0.5                  |
| Interval (mm)                              | ASIR                                                                                                                                                                                                                                                                                | ASIR                   | ASIR                 |
| Iterative Reconstruction (Noise Reduction) | plus                                                                                                                                                                                                                                                                                | plus                   | plus                 |
| Recon Mode                                 |                                                                                                                                                                                                                                                                                     |                        |                      |
| Reconstructions                            | STANDARD                                                                                                                                                                                                                                                                            | STANDARD               | STANDARD             |
| Low1                                       | BONE                                                                                                                                                                                                                                                                                | BONE                   | BONE                 |
| Low2                                       | STANDARD ASIR 40%                                                                                                                                                                                                                                                                   | STANDARD ASIR 40%      | STANDARD ASIR 40%    |
| Low2i                                      | BONE ASIR 40%                                                                                                                                                                                                                                                                       | BONE ASIR 40%          | BONE ASIR 40%        |
| Low3i                                      | STANDARD ASIR 100%                                                                                                                                                                                                                                                                  | STANDARD ASIR 100%     | STANDARD ASIR 100%   |
| Low4i                                      | Same as phase 1                                                                                                                                                                                                                                                                     | Same as phase 1        | Same as phase 1      |
| DFOV (mm)*                                 | *If the DFOV from the baseline CT scan was too large, additional lowdose and iterative recons with a tighter DFOV will be requested. The CT Scan Parameters Report provided by the coordinator will specify the required the coordinator will specify the required reconstructions. |                        |                      |

# Philips

| 1.7 CT Scanning Protocol                                                                                                                                                                                                                                                           | Inspiratory CT             | Expiratory CT              | Inspiratory CT            | Expiratory CT             |
|------------------------------------------------------------------------------------------------------------------------------------------------------------------------------------------------------------------------------------------------------------------------------------|----------------------------|----------------------------|---------------------------|---------------------------|
| Scanner Make                                                                                                                                                                                                                                                                       | <b>Philips</b>             | <b>Philips</b>             | <b>Philips</b>            | <b>Philips</b>            |
| Scanner Model                                                                                                                                                                                                                                                                      | <b>Brilliance 40 slice</b> | <b>Brilliance 40 slice</b> | <b>Brilliance 64/256</b>  | <b>Brilliance 64/256</b>  |
| Scan Type                                                                                                                                                                                                                                                                          | Spiral Helix               | Spiral Helix               | Spiral Helix              | Spiral Helix              |
| Scan FOV                                                                                                                                                                                                                                                                           | No Selection               | No Selection               | No Selection              | No Selection              |
| Rotation Time (s)                                                                                                                                                                                                                                                                  | 0.5                        | 0.5                        | 0.5                       | 0.5                       |
| Det. Configuration                                                                                                                                                                                                                                                                 | 40 x 0.625                 | 40 x 0.625                 | 64 x 0.625                | 64 x 0.625                |
| Pitch                                                                                                                                                                                                                                                                              | 0.923                      | 0.923                      | 0.923                     | 0.923                     |
| kVp                                                                                                                                                                                                                                                                                | 120                        | 120                        | 120                       | 120                       |
| mAs                                                                                                                                                                                                                                                                                | mAs 200                    | mAs 50                     | mAs 200                   | mAs 50                    |
| Dose Modulation                                                                                                                                                                                                                                                                    | Dose Right (ACS) OFF       | Dose Right (ACS) OFF       | Dose Right (ACS) OFF      | Dose Right (ACS) OFF      |
| HD Mode                                                                                                                                                                                                                                                                            | n/a                        | n/a                        | n/a                       | n/a                       |
| Scan Time(s) 30cm Length                                                                                                                                                                                                                                                           | <10                        | <10                        | <10                       | <10                       |
| Additional Image Filters                                                                                                                                                                                                                                                           | Adaptive Filtering OFF     | Adaptive Filtering OFF     | Adaptive Filtering OFF    | Adaptive Filtering OFF    |
| Thickness (mm)                                                                                                                                                                                                                                                                     | 0.67                       | 0.67                       | 0.67                      | 0.67                      |
| Interval (mm)                                                                                                                                                                                                                                                                      | 0.5                        | 0.5                        | 0.5                       | 0.5                       |
| Iterative Reconstruction (Noise Reduction)                                                                                                                                                                                                                                         | Do Not Use iDOSE           | Do Not Use iDOSE           | Do Not Use iDOSE          | Do Not Use iDOSE          |
| <b>Reconstructions</b>                                                                                                                                                                                                                                                             |                            |                            |                           |                           |
| RECON 1 Algorithm                                                                                                                                                                                                                                                                  | B                          | B                          | B                         | B                         |
| RECON 2 Algorithm                                                                                                                                                                                                                                                                  | D (YB if D not available)  | D (YB if D not available)  | D (YB if D not available) | D (YB if D not available) |
| DFOV (mm)*                                                                                                                                                                                                                                                                         | Same as phase 1            | Same as phase 1            | Same as phase 1           | Same as phase 1           |
| *If the DFOV from the baseline CT scan was too large, additional inspiratory and expiratory reconstructions will be requested using the RECON 1 algorithm and a tighter DFOV. The CT Scan Parameters Report provided by the coordinator will specify the required reconstructions. |                            |                            |                           |                           |

# Philips Reduced Dose

| 1.7 CT Scanning Protocol                   | Inspiratory CT                           |
|--------------------------------------------|------------------------------------------|
| Scanner Make                               | <b>Philips</b>                           |
| Scanner Model                              | <b>Brilliance 64/256</b>                 |
| Scan Type                                  | Spiral Helix                             |
| Scan FOV                                   | No Selection                             |
| Rotation Time (s)                          | 0.5                                      |
| Det. Configuration                         | 64 x 0.625                               |
| Pitch                                      | 0.923                                    |
| kVp                                        | 120                                      |
| Reference mAs                              | 46 mAs (128mA)                           |
| Dose Modulation                            | Z-DOM or DoseRight ON                    |
| HD Mode                                    | n/a                                      |
| Scan Time(s) 30cm Length                   | <10                                      |
| Additional Image Filters                   | Adaptive Filtering OFF                   |
| Thickness (mm)                             | 0.67                                     |
| Interval (mm)                              | 0.5                                      |
| Iterative Reconstruction (Noise Reduction) | iDose ON                                 |
| <b>Reconstructions</b>                     |                                          |
| Low1                                       | B                                        |
| Low2                                       | D<br>(YB where D not available)          |
| Low2i                                      | B iDose L3                               |
| Low3i                                      | D iDose L3<br>(YB where D not available) |
| Low4i                                      | B iDose L6                               |
| DFOV (mm)*                                 | Same as phase 1                          |

\*If the DFOV from the baseline CT scan was too large, additional lowdose and iterative recons with a tighter DFOV will be requested. The CT Scan Parameters Report provided by the coordinator will specify the required reconstructions.

# Siemens Standard Dose 1

| 1.7 CT Scanning Protocol                                                                                                                                                                                                                                                           | Inspiratory CT            | Expiratory CT             | Inspiratory CT            | Expiratory CT             | Inspiratory CT            | Expiratory CT             |
|------------------------------------------------------------------------------------------------------------------------------------------------------------------------------------------------------------------------------------------------------------------------------------|---------------------------|---------------------------|---------------------------|---------------------------|---------------------------|---------------------------|
| Scanner Make                                                                                                                                                                                                                                                                       | <b>Siemens</b>            | <b>Siemens</b>            | <b>Siemens</b>            | <b>Siemens</b>            | <b>Siemens</b>            | <b>Siemens</b>            |
| Scanner Model                                                                                                                                                                                                                                                                      | <b>Sensation 16 slice</b> | <b>Sensation 16 slice</b> | <b>Biograph 40 slice</b>  | <b>Biograph 40 slice</b>  | <b>Sensation 64 slice</b> | <b>Sensation 64 slice</b> |
| Scan Type                                                                                                                                                                                                                                                                          | Spiral                    | Spiral                    | Spiral                    | Spiral                    | Spiral                    | Spiral                    |
| Scan FOV                                                                                                                                                                                                                                                                           | No Selection              |
| Rotation Time (s)                                                                                                                                                                                                                                                                  | 0.5                       | 0.5                       | 0.5                       | 0.5                       | 0.5                       | 0.5                       |
| Det. Configuration                                                                                                                                                                                                                                                                 | 16 x 0.75                 | 16 x 0.75                 | 40 x 0.6                  | 40 x 0.6                  | (64) 32 x 0.6             | (64) 32 x 0.6             |
| Pitch                                                                                                                                                                                                                                                                              | 1.1                       | 1.1                       | 1.1                       | 1.1                       | 1                         | 1                         |
| kVp                                                                                                                                                                                                                                                                                | 120                       | 120                       | 120                       | 120                       | 120                       | 120                       |
| Eff. mAs                                                                                                                                                                                                                                                                           | Effective mAs 200         | Effective mAs 50          | Effective mAs 200         | Effective mAs 50          | Effective mAs 200         | Effective mAs 50          |
| Dose Modulation                                                                                                                                                                                                                                                                    | Care Dose OFF             |
| HD Mode                                                                                                                                                                                                                                                                            | n/a                       | n/a                       | n/a                       | n/a                       | n/a                       | n/a                       |
| Scan Time(s) 30cm Length                                                                                                                                                                                                                                                           | <10                       | <10                       | <10                       | <10                       | <10                       | <10                       |
| Additional Image Filters                                                                                                                                                                                                                                                           | No Selection              |
| Thickness (mm)                                                                                                                                                                                                                                                                     | 0.75                      | 0.75                      | 0.75                      | 0.75                      | 0.75                      | 0.75                      |
| Interval (mm)                                                                                                                                                                                                                                                                      | 0.5                       | 0.5                       | 0.5                       | 0.5                       | 0.5                       | 0.5                       |
| Iterative Reconstruction (Noise Reduction)                                                                                                                                                                                                                                         | Do Not Use IRIS or SAFIRE |
| <b>Reconstructions</b>                                                                                                                                                                                                                                                             |                           |                           |                           |                           |                           |                           |
| RECON 1 Algorithm                                                                                                                                                                                                                                                                  | B31f                      | B31f                      | B31f                      | B31f                      | B31f                      | B31f                      |
| RECON 2 Algorithm                                                                                                                                                                                                                                                                  | B46f                      | B46f                      | B45f                      | B45f                      | B46f                      | B46f                      |
| RECON 3 Algorithm                                                                                                                                                                                                                                                                  | B35f                      | B35f                      | B35f                      | B35f                      | B35f                      | B35f                      |
| DFOV (mm)*                                                                                                                                                                                                                                                                         | Same as phase 1           |
| *If the DFOV from the baseline CT scan was too large, additional inspiratory and expiratory reconstructions will be requested using the RECON 1 algorithm and a tighter DFOV. The CT Scan Parameters Report provided by the coordinator will specify the required reconstructions. |                           |                           |                           |                           |                           |                           |

# Siemens Standard Dose 2

| 1.7 CT Scanning Protocol                   | Inspiratory CT                         | Expiratory CT                          | Inspiratory CT                    | Expiratory CT                     | Inspiratory CT                    | Expiratory CT                     | Inspiratory CT       | Expiratory CT        |
|--------------------------------------------|----------------------------------------|----------------------------------------|-----------------------------------|-----------------------------------|-----------------------------------|-----------------------------------|----------------------|----------------------|
| Scanner Make                               | <b>Siemens</b>                         | <b>Siemens</b>                         | <b>Siemens</b>                    | <b>Siemens</b>                    | <b>Siemens</b>                    | <b>Siemens</b>                    | <b>Siemens</b>       | <b>Siemens</b>       |
| Scanner Model                              | <b>Definition (DS and AS) 64 slice</b> | <b>Definition (DS and AS) 64 slice</b> | <b>Definition (AS+) 128 slice</b> | <b>Definition (AS+) 128 slice</b> | <b>Definition Flash 128 slice</b> | <b>Definition Flash 128 slice</b> | <b>Somatom Force</b> | <b>Somatom Force</b> |
| Scan Type                                  | Spiral Single Source                   | Spiral Single Source                   | Spiral                            | Spiral                            | Spiral Single Source              | Spiral Single Source              | Spiral Single Source | Spiral Single Source |
| Scan FOV                                   | No Selection                           | No Selection                           | No Selection                      | No Selection                      | No Selection                      | No Selection                      | No Selection         | No Selection         |
| Rotation Time (s)                          | 0.5                                    | 0.5                                    | 0.5                               | 0.5                               | 0.5                               | 0.5                               | 0.5                  | 0.5                  |
| Det. Configuration                         | (64) 32 x 0.6                          | (64) 32 x 0.6                          | (128) 64 x 0.6                    | (128) 64 x 0.6                    | (128) 64 x 0.6                    | (128) 64 x 0.6                    | (128) 64 x 0.6       | (128) 64 x 0.6       |
| Pitch                                      | 1                                      | 1                                      | 1                                 | 1                                 | 1                                 | 1                                 | 1                    | 1                    |
| kVp                                        | 120                                    | 120                                    | 120                               | 120                               | 120                               | 120                               | 120                  | 120                  |
| Eff. mAs                                   | Effective mAs 200                      | Effective mAs 50                       | Effective mAs 200                 | Effective mAs 50                  | Effective mAs 200                 | Effective mAs 50                  | Effective mAs 200    | Effective mAs 50     |
| Dose Modulation                            | Care Dose OFF                          | Care Dose OFF                          | Care Dose OFF                     | Care Dose OFF                     | Care Dose OFF                     | Care Dose OFF                     | Care Dose OFF        | Care Dose OFF        |
| HD Mode                                    | n/a                                    | n/a                                    | n/a                               | n/a                               | n/a                               | n/a                               | n/a                  | n/a                  |
| Scan Time(s) 30cm Length                   | <10                                    | <10                                    | <10                               | <10                               | <10                               | <10                               | <10                  | <10                  |
| Additional Image Filters                   | No Selection                           | No Selection                           | No Selection                      | No Selection                      | No Selection                      | No Selection                      | No Selection         | No Selection         |
| Thickness (mm)                             | 0.75                                   | 0.75                                   | 0.75                              | 0.75                              | 0.75                              | 0.75                              | 0.75                 | 0.75                 |
| Interval (mm)                              | 0.5                                    | 0.5                                    | 0.5                               | 0.5                               | 0.5                               | 0.5                               | 0.5                  | 0.5                  |
| Iterative Reconstruction (Noise Reduction) | Do Not Use IRIS or SAFIRE              | Do Not Use IRIS or SAFIRE              | Do Not Use IRIS or SAFIRE         | Do Not Use IRIS or SAFIRE         | Do Not Use IRIS or SAFIRE         | Do Not Use IRIS or SAFIRE         | Do Not Use ADMIRE    | Do Not Use ADMIRE    |
| <b>Reconstructions</b>                     |                                        |                                        |                                   |                                   |                                   |                                   |                      |                      |
| RECON 1 Algorithm                          | B31f                                   | B31f                                   | B31f                              | B31f                              | B31f                              | B31f                              | Bf40d                | Bf40d                |
| RECON 2 Algorithm                          | B45f                                   | B45f                                   | B45f                              | B45f                              | B46f                              | B46f                              | Qr44d                | Qr44d                |
| RECON 3 Algorithm                          | B35f                                   | B35f                                   | B35f                              | B35f                              | B35f                              | B35f                              | Qr40d                | Qr40d                |
| DFOV (mm)*                                 | Same as phase 1                        | Same as phase 1                        | Same as phase 1                   | Same as phase 1                   | Same as phase 1                   | Same as phase 1                   | Same as phase 1      | Same as phase 1      |

\*If the DFOV from the baseline CT scan was too large, additional inspiratory and expiratory reconstructions will be requested using the RECON 1 algorithm and a tighter DFOV. The CT Scan Parameters Report provided by the coordinator will specify the required reconstructions.

# Siemens Reduced Dose 1

| 1.7 CT Scanning Protocol                                                                                                                                                                                                                                                                   | Inspiratory Lowdose and Iterative CT |                          |                           |
|--------------------------------------------------------------------------------------------------------------------------------------------------------------------------------------------------------------------------------------------------------------------------------------------|--------------------------------------|--------------------------|---------------------------|
|                                                                                                                                                                                                                                                                                            | Siemens                              | Siemens                  | Siemens                   |
| Scanner Make                                                                                                                                                                                                                                                                               | <b>Sensation 16 slice</b>            | <b>Biograph 40 slice</b> | <b>Sensation 64 slice</b> |
| Scanner Model                                                                                                                                                                                                                                                                              | Sensation 16 slice                   | Biograph 40 slice        | Sensation 64 slice        |
| Scan Type                                                                                                                                                                                                                                                                                  | Spiral                               | Spiral                   | Spiral                    |
| Scan FOV                                                                                                                                                                                                                                                                                   | No Selection                         | No Selection             | No Selection              |
| Rotation Time (s)                                                                                                                                                                                                                                                                          | 0.5                                  | 0.5                      | 0.5                       |
| Det. Configuration                                                                                                                                                                                                                                                                         | 16 x 0.75                            | 40 x 0.6                 | (64) 32 x 0.6             |
| Pitch                                                                                                                                                                                                                                                                                      | 1.1                                  | 1.1                      | 1                         |
| kVp                                                                                                                                                                                                                                                                                        | 120                                  | 120                      | 120                       |
| Reference mAs                                                                                                                                                                                                                                                                              | Reference 35mAs                      | Reference 35mAs          | Reference 35mAs           |
| Dose Modulation                                                                                                                                                                                                                                                                            | Care Dose ON                         | Care Dose ON             | Care Dose ON              |
| HD Mode                                                                                                                                                                                                                                                                                    | n/a                                  | n/a                      | n/a                       |
| Scan Time(s) 30cm Length                                                                                                                                                                                                                                                                   | <10                                  | <10                      | <10                       |
| Additional Image Filters                                                                                                                                                                                                                                                                   | No Selection                         | No Selection             | No Selection              |
| Thickness (mm)                                                                                                                                                                                                                                                                             | 0.75                                 | 0.75                     | 0.75                      |
| Interval (mm)                                                                                                                                                                                                                                                                              | 0.5                                  | 0.5                      | 0.5                       |
| Iterative Reconstruction (Noise Reduction)                                                                                                                                                                                                                                                 | SAFIRE                               | SAFIRE                   | SAFIRE                    |
| <b>Reconstructions</b>                                                                                                                                                                                                                                                                     |                                      |                          |                           |
| Low1                                                                                                                                                                                                                                                                                       | B31f                                 | B31f                     | B31f                      |
| Low2                                                                                                                                                                                                                                                                                       | B45f                                 | B45f                     | B46f                      |
| Low2i                                                                                                                                                                                                                                                                                      | I31f SAFIRE 2                        | I31f SAFIRE 2            | I31f SAFIRE 2             |
| Low3i                                                                                                                                                                                                                                                                                      | I44f SAFIRE 2                        | I44f SAFIRE 2            | I44f SAFIRE 2             |
| Low4i                                                                                                                                                                                                                                                                                      | I31f SAFIRE 5                        | I31f SAFIRE 5            | I31f SAFIRE 5             |
| DFOV (mm)*                                                                                                                                                                                                                                                                                 | Same as phase 1                      | Same as phase 1          | Same as phase 1           |
| <p>*If the DFOV from the baseline CT scan was too large, additional lowdose and iterative recons with a tighter DFOV will be requested. The CT Scan Parameters Report provided by the coordinator will specify the required the coordinator will specify the required reconstructions.</p> |                                      |                          |                           |

## Siemens Reduced Dose 2

| 1.7 CT Scanning Protocol                                                                                                                                                                                                                                                            | Inspiratory Lowdose and Iterative CT |                            |                            |                      |
|-------------------------------------------------------------------------------------------------------------------------------------------------------------------------------------------------------------------------------------------------------------------------------------|--------------------------------------|----------------------------|----------------------------|----------------------|
| Scanner Make                                                                                                                                                                                                                                                                        | Siemens                              | Siemens                    | Siemens                    | Siemens              |
| Scanner Model                                                                                                                                                                                                                                                                       | Definition (DS and AS) 64 slice      | Definition (AS+) 128 slice | Definition Flash 128 slice | Somatom Force        |
| Scan Type                                                                                                                                                                                                                                                                           | Spiral Single Source                 | Spiral                     | Spiral Single Source       | Spiral Single Source |
| Scan FOV                                                                                                                                                                                                                                                                            | No Selection                         | No Selection               | No Selection               | No Selection         |
| Rotation Time (s)                                                                                                                                                                                                                                                                   | 0.5                                  | 0.5                        | 0.5                        | 0.5                  |
| Det. Configuration                                                                                                                                                                                                                                                                  | (64) 32 x 0.6                        | (128) 64 x 0.6             | (128) 64 x 0.6             | (128) 64 x 0.6       |
| Pitch                                                                                                                                                                                                                                                                               | 1                                    | 1                          | 1                          | 1                    |
| kVp                                                                                                                                                                                                                                                                                 | 120                                  | 120                        | 120                        | 120                  |
| Reference mAs                                                                                                                                                                                                                                                                       | Reference 35mAs                      | Reference 35mAs            | Reference 35mAs            | Reference 35mAs      |
| Dose Modulation                                                                                                                                                                                                                                                                     | Care Dose ON                         | Care Dose ON               | Care Dose ON               | Care Dose ON         |
| HD Mode                                                                                                                                                                                                                                                                             | n/a                                  | n/a                        | n/a                        | n/a                  |
| Scan Time(s) 30cm Length                                                                                                                                                                                                                                                            | <10                                  | <10                        | <10                        | <10                  |
| Additional Image Filters                                                                                                                                                                                                                                                            | No Selection                         | No Selection               | No Selection               | No Selection         |
| Thickness (mm)                                                                                                                                                                                                                                                                      | 0.75                                 | 0.75                       | 0.75                       | 0.75                 |
| Interval (mm)                                                                                                                                                                                                                                                                       | 0.5                                  | 0.5                        | 0.5                        | 0.5                  |
| Iterative Reconstruction (Noise Reduction)                                                                                                                                                                                                                                          | SAFIRE                               | SAFIRE                     | SAFIRE                     | ADMIRE               |
| <b>Reconstructions</b>                                                                                                                                                                                                                                                              |                                      |                            |                            |                      |
| Low1                                                                                                                                                                                                                                                                                | B31f                                 | B31f                       | B31f                       | Bf40d                |
| Low2                                                                                                                                                                                                                                                                                | B45f                                 | B45f                       | B46f                       | Qr44d                |
| Low2i                                                                                                                                                                                                                                                                               | I31f SAFIRE 2                        | I31f SAFIRE 2              | I31f SAFIRE 2              | Bf40d ADMIRE 2       |
| Low3i                                                                                                                                                                                                                                                                               | I44f SAFIRE 2                        | I44f SAFIRE 2              | I44f SAFIRE 2              | Qr44d ADMIRE 2       |
| Low4i                                                                                                                                                                                                                                                                               | I31f SAFIRE 5                        | I31f SAFIRE 5              | I31f SAFIRE 5              | Bf40d ADMIRE 5       |
| DFOV (mm)*                                                                                                                                                                                                                                                                          | Same as phase 1                      | Same as phase 1            | Same as phase 1            | Same as phase 1      |
| *If the DFOV from the baseline CT scan was too large, additional lowdose and iterative recons with a tighter DFOV will be requested. The CT Scan Parameters Report provided by the coordinator will specify the required the coordinator will specify the required reconstructions. |                                      |                            |                            |                      |
