# Supplementary material
Source: PubMed Central journal article supplement (PMC8098098)
Supplement: ryct200503suppa2.pdf [file ryct200503suppa2.pdf]

## Appendix E1

[Download](#) (PDF)

**Table E1. Number of subjects according to scanner make and convolution kernels.**

|                           | Number of subjects |                                     | Number of subjects |
|---------------------------|--------------------|-------------------------------------|--------------------|
| Filtered back projection  |                    | Iterative reconstruction            |                    |
| General Electric STANDARD | 441                | General Electric STANDARD + ASIR100 | 438                |
| Siemens B31f              | 493                | Siemens I31f                        | 202                |
| Siemens Bf40d             | 235                |                                     |                    |
| Philips B                 | 36                 |                                     |                    |

**Table E2. Number of scans by manufacturer and model.**

|                    |                |
|--------------------|----------------|
| GE                 | 441/1205 (37%) |
| Discovery CT750 HD | 209            |
| LightSpeed VCT     | 135            |
| LightSpeed VCT64   | 44             |
| Revolution CT      | 53             |
|                    |                |
| Siemens            | 728/1205 (60%) |
| Definition         | 28             |
| Definition AS      | 154            |
| Definition AS+     | 167            |
| Definition Edge    | 2              |
| Force              | 235            |
| Sensation 64       | 142            |
|                    |                |
| Philips            | 36/1205 (3%)   |
| Brilliance64       | 35             |
| iCT 256            | 1              |

## Appendix E2

### Volume Adjustment

The volume adjustment model assumed spatially uniform volume changes and thus spatially uniform density changes in the lungs (ie, mass-preserving).

Application of the volume adjustment model to a CT scan is performed using the equation below:

$$CT_{VA}(i) = \left( \frac{V_{actual}}{V_{predicted}} CT_{original}(i) + 1000 HU \right) - 1000 HU$$

where  $CT_{\text{original}}(i)$  is the HU value at voxel  $i$  in the nonadjusted CT scan,  $CT_{\text{VA}}(i)$  is the HU value at voxel  $i$  in the volume adjusted CT scan,  $V_{\text{actual}}$  is the lung volume obtained from the CT scan, and  $V_{\text{predicted}}$  is the predicted volume. The equation used to calculate patient specific predicted lung volume was developed from the Multi-Ethnic Study of Atherosclerosis (MESA) in Hoffman et al (18, Table 4). It depends on age, height, sex, race/ethnicity, and body mass index. Pompe et al (1) validated the MESA equation for COPDGene and found that it was suitable.

## Reproducibility Coefficient

The reproducibility coefficients for Perc15 and LAA-950 were computed using two different methods, which are outlined in Obuchowski et al. Perc15 uses within-subject variance (wSD) method

$$wSD^2 = \frac{\sum_n^N (x_n^{FD} - x_n^{RD})^2}{2N}$$

where  $n$  is an individual subject and  $N$  is the total number of subjects.

Because differences in LAA-950 vary as a function of the average LAA-950 value (see Fig E1), a significant ratio between measurements is calculated using the within-subject coefficient of variation (wCV) rather than the wSD

$$wCV^2 = \frac{\sum_n^N \frac{(x_n^{FD} - x_n^{RD})^2}{2\mu_n^2}}{N}, \mu_n = \frac{x_n^{FD} + x_n^{RD}}{2}$$

where  $n$  is an individual subject and  $N$  is the total number of subjects.

The reproducibility coefficients (RDC) are computed using the following equations

$$RDC_{\text{perc15}} = 2.77\sqrt{wSD^2}$$

$$RDC_{\text{LAA-950}} = 2.77\sqrt{wCV^2}$$

Thus, the RDCs should be interpreted as follows

$$-RDC_{\text{perc15}} < \text{Perc15}_{\text{follow-up}} - \text{Perc15}_{\text{baseline}} < RDC_{\text{perc15}} : \text{No change}$$

$$-RDC_{\text{perc15}} > \text{Perc15}_{\text{follow-up}} - \text{Perc15}_{\text{baseline}} : \text{True regression}$$

$$\text{Perc15}_{\text{follow-up}} - \text{Perc15}_{\text{baseline}} > RDC_{\text{perc15}} : \text{True progression}$$

$$-RDC_{\text{LAA-950}} < \frac{\text{LAA}_{\text{baseline}} - \text{LAA}_{\text{follow-up}}}{0.5 * (\text{LAA}_{\text{baseline}} + \text{LAA}_{\text{follow-up}})} < -RDC_{\text{LAA-950}} : \text{No change}$$

$$-RDC_{\text{LAA-950}} > \frac{\text{LAA}_{\text{baseline}} - \text{LAA}_{\text{follow-up}}}{0.5 * (\text{LAA}_{\text{baseline}} + \text{LAA}_{\text{follow-up}})} : \text{True regression}$$

$$\frac{LAA_{baseline} - LAA_{follow-up}}{0.5 * (LAA_{baseline} + LAA_{follow-up})} : > RDC_{LAA-950} : \text{True progression}$$

Python code for computing the reproducibility coefficients is shown below:

```
#x_fd is a numpy.ndarray containing full-dose measurements
#x_rd is a numpy.ndarray containing reduced-dose measurements
import numpy as np
def compute_within_subject_variance_RDC (x_fd, x_rd):
    n = len (x_fd)
    difference = x_fd-x_rd
    dsum = (difference * difference).sum ()
    dsum = dsum/(2*N)
    return 2.77*np.sqrt (dsum)
def compute_within_subject_coef_var_RDC (x_fd, x_rd):
    n = len (x_fd)
    difference = x_fd-x_rd
    mean = 0.5 * (x_fd + x_rd)
    dsum = ((difference * difference)/(2*mean*mean)).sum ()
    dsum = dsum/N
    return 2.77*np.sqrt (dsum)
```

**Table E3. LAA-950 reproducibility coefficients, limits of agreement, and biases for each comparison between FD and RD scans.**

| Dose Comparison                  | LAA-950 reproducibility coefficient | LAA-950 limits of agreement | LAA-950 bias  | P value |
|----------------------------------|-------------------------------------|-----------------------------|---------------|---------|
| <u>No volume adjustment</u>      |                                     |                             |               |         |
| FD vs RD                         | 242.19 ± 4.40                       | 6.09 ± 0.23                 | 4.84% ± 0.17% | 0.001   |
| FD vs RD-MF                      | 106.40 ± 4.68                       | 2.60 ± 0.25                 | 0.59% ± 0.08% | 0.001   |
| FD vs RD-IR                      | 91.53 ± 6.31                        | 2.16 ± 0.28                 | 0.19% ± 0.09% | 0.001   |
| <u>Volume Adjustment Applied</u> |                                     |                             |               |         |
| FD vs RD                         | 248.84 ± 4.06                       | 5.37 ± 0.22                 | 4.76% ± 0.15% | 0.001   |
| FD vs RD-MF                      | 99.91 ± 4.30                        | 1.99 ± 0.14                 | 0.52% ± 0.06% | 0.001   |
| FD vs RD-IR                      | 79.77 ± 4.94                        | 1.81 ± 0.20                 | 0.19% ± 0.07% | 0.001   |

FD vs RD comparisons were between 1205 subjects, while FD vs RD-IR were between 640 subjects. Note that the repeatability coefficient for LAA-950 is expressed as a percentage increase rather than measurement difference (see Appendix E3 for details).

**Table E4. Perc15 reproducibility coefficients, limits of agreement, and biases for comparisons between FD and RD scans for the subset of subjects that had iterative reconstructions available ( $n = 640$ ).**

| Dose Comparison                  | Perc15 reproducibility coefficient (HU) | Perc15 limits of agreement (HU) | Perc15 bias (HU) | P value |
|----------------------------------|-----------------------------------------|---------------------------------|------------------|---------|
| <u>No volume adjustment</u>      |                                         |                                 |                  |         |
| FD vs RD                         | 34.37 ± 2.18                            | 22.33 ± 3.69                    | 13.32 ± 0.89     | <0.001  |
| FD vs RD-MF                      | 22.16 ± 3.82                            | 22.10 ± 3.89                    | 0.82 ± 0.87      | 0.073   |
| FD vs RD-IR                      | 22.48 ± 3.92 HU                         | 21.89 ± 3.83                    | -2.63 ± 0.87     | <0.001  |
| <u>Volume Adjustment Applied</u> |                                         |                                 |                  |         |
| FD vs RD                         | 30.61 ± 0.83                            | 10.48 ± 0.63                    | 14.68 ± 0.42     | <0.001  |
| FD vs RD-MF                      | 8.31 ± 0.52                             | 7.15 ± 0.48                     | 2.16 ± 0.28      | <0.001  |
| FD vs RD-IR                      | 7.10 ± 0.52 HU                          | 6.49 ± 0.56                     | -1.47 ± 0.26     | <0.001  |

**Table E5. LAA-950 reproducibility coefficients, limits of agreement, and biases for comparisons between FD and RD scans for the subset of subjects that had iterative reconstructions available ( $n = 640$ ).**

| Dose Comparison                  | LAA-950 reproducibility coefficient (%) | LAA-950 limits of agreement (%) | LAA-950 bias (%) | P value |
|----------------------------------|-----------------------------------------|---------------------------------|------------------|---------|
| <u>No volume adjustment</u>      |                                         |                                 |                  |         |
| FD vs RD                         | 256.56 ± 5.62                           | 6.32 ± 0.33                     | -4.57 ± 0.25     | <0.01   |
| FD vs RD-MF                      | 120.31 ± 6.24                           | 2.65 ± 0.25                     | -0.79 ± 0.10     | 0.07    |
| FD vs RD-IR                      | 91.53 ± 6.31                            | 2.16 ± 0.28                     | 0.19 ± 0.09      | <0.01   |
| <u>Volume Adjustment Applied</u> |                                         |                                 |                  |         |
| FD vs RD                         | 263.19 ± 5.32                           | 5.30 ± 0.29                     | -4.50 ± 0.20     | <0.01   |
| FD vs RD-MF                      | 114.51 ± 6.13                           | 2.00 ± 0.17                     | -0.69 ± 0.08     | <0.01   |
| FD vs RD-IR                      | 79.77 ± 4.94                            | 1.81 ± 0.20                     | 0.19 ± 0.07      | <0.01   |

Note that the repeatability coefficient for LAA-950 is expressed as a percentage increase rather than measurement difference (see Appendix E3 for details).

**Table E6. Differences of longitudinal changes (baseline to five-year follow-up) in Perc15 between FD and RD protocols.**

| $\Delta$ Perc15                                                                                      | Mean    | Standard Deviation | Standard Error |
|------------------------------------------------------------------------------------------------------|---------|--------------------|----------------|
| $(FD_{\text{follow-up}} - FD_{\text{baseline}}) - (RD_{\text{follow-up}} - FD_{\text{baseline}})$    | 15.0 HU | 5.4 HU             | 0.22           |
| $(FD_{\text{follow-up}} - FD_{\text{baseline}}) - (RD_{\text{MF follow-up}} - FD_{\text{baseline}})$ | 2.2 HU  | 3.7 HU             | 0.16           |
| $(FD_{\text{follow-up}} - FD_{\text{baseline}}) - (RD_{\text{IR follow-up}} - FD_{\text{baseline}})$ | 1.5 HU  | 3.4 HU             | 0.14           |

**Table E7. Receiver operating curve characteristic AUCs with P values in comparison to the FD scan, J-statistic values, and optimal prediction thresholds ( $\pm 95$ CI) for LAA-950 based prediction of spirometrically defined COPD diagnosis and at least one annual exacerbation using different dose and noise filtering methods.**

| Dose Comparison       | Volume adjustment applied    |             |                       | No volume adjustment |             |                       |
|-----------------------|------------------------------|-------------|-----------------------|----------------------|-------------|-----------------------|
|                       | ROC-AUC (P value vs FD scan) | J-statistic | Optimal threshold (%) | ROC-AUC              | J-statistic | Optimal threshold (%) |
| <b>COPD Diagnosis</b> |                              |             |                       |                      |             |                       |

|                                         |                                     |               |             |                                     |               |             |
|-----------------------------------------|-------------------------------------|---------------|-------------|-------------------------------------|---------------|-------------|
| FD                                      | 0.796 ± 0.043<br>( <i>P</i> = NA)   | 0.516 ± 0.071 | 1.44 ± 0.60 | 0.821 ± 0.040<br>( <i>P</i> = NA)   | 0.553 ± 0.070 | 1.94 ± 0.79 |
| RD                                      | 0.771 ± 0.042<br>( <i>P</i> = .02)  | 0.465 ± 0.075 | 8.36 ± 1.13 | 0.787 ± 0.042<br>( <i>P</i> < .001) | 0.507 ± 0.074 | 8.84 ± 1.24 |
| RD-MF                                   | 0.784 ± 0.042<br>( <i>P</i> = .13)  | 0.492 ± 0.074 | 3.05 ± 0.69 | 0.801 ± 0.041<br>( <i>P</i> = .001) | 0.529 ± 0.073 | 3.41 ± 0.82 |
| RD-IR                                   | 0.754 ± 0.046<br>( <i>P</i> < .001) | 0.445 ± 0.074 | 1.68 ± 0.81 | 0.790 ± 0.043<br>( <i>P</i> < .001) | 0.517 ± 0.074 | 2.06 ± 0.54 |
| <b>At least one annual exacerbation</b> |                                     |               |             |                                     |               |             |
| FD                                      | 0.647 ± 0.064<br>( <i>P</i> = NA)   | 0.323 ± 0.100 | 1.44 ± 0.53 | 0.643 ± 0.066<br>( <i>P</i> = NA)   | 0.299 ± 0.097 | 1.72 ± 1.44 |
| RD                                      | 0.618 ± 0.063<br>( <i>P</i> = .08)  | 0.231 ± 0.093 | 7.97 ± 4.15 | 0.611 ± 0.063<br>( <i>P</i> = .04)  | 0.220 ± 0.092 | 9.67 ± 6.57 |
| RD-MF                                   | 0.618 ± 0.065<br>( <i>P</i> = .01)  | 0.239 ± 0.096 | 3.22 ± 3.05 | 0.613 ± 0.066<br>( <i>P</i> = .01)  | 0.234 ± 0.096 | 4.08 ± 4.56 |
| RD-IR                                   | 0.615 ± 0.066<br>( <i>P</i> = .03)  | 0.261 ± 0.100 | 1.95 ± 1.34 | 0.618 ± 0.066<br>( <i>P</i> = .03)  | 0.244 ± 0.097 | 2.26 ± 3.20 |

Due to this being a direct comparison between RD scan noise reduction techniques, only scans that had IR were included in the analysis.

**Table E8. Spearman correlations between CTD measurements and GOLD stage using different dose and noise filtering methods.**

| Dose Comparison | Volume adjustment applied |                | No volume adjustment |                |
|-----------------|---------------------------|----------------|----------------------|----------------|
|                 | <i>r</i>                  | <i>P</i> value | <i>r</i>             | <i>P</i> value |
| <b>Perc15</b>   |                           |                |                      |                |
| FD              | -0.41 ± 0.06              | <0.001         | -0.43 ± 0.06         | <0.001         |
| RD              | -0.41 ± 0.06              | <0.001         | -0.41 ± 0.06         | <0.001         |
| RD-MF           | -0.40 ± 0.06              | <0.001         | -0.41 ± 0.06         | <0.001         |
| RD-IR           | -0.40 ± 0.08              | <0.001         | -0.43 ± 0.08         | <0.001         |
| <b>LAA-950</b>  |                           |                |                      |                |
| FD              | 0.50 ± 0.05               | <0.001         | 0.49 ± 0.05          | <0.001         |
| RD              | 0.45 ± 0.06               | <0.001         | 0.44 ± 0.06          | <0.001         |
| RD-MF           | 0.49 ± 0.05               | <0.001         | 0.47 ± 0.06          | <0.001         |
| RD-IR           | 0.45 ± 0.08               | <0.001         | 0.48 ± 0.08          | <0.001         |

Only subjects with GOLD stage 0–4 were used for this analysis, resulting in 913 total subjects for FD, RD, and RD-MF scans and 497 subjects for RD-IR scans.
